# Supplementary material for: Context-Specific Bioturbation Mediates Changes to Ecosystem Functioning
Source: Springer Nature journal article supplement (doi:10.1007/s10021-011-9468-0), 2011-08-02
Supplement: MOESM1 [file 10021_2011_9468_MOESM1_ESM.doc]

**FOR ONLINE PUBLICATION ONLY**

**Supplementary Material**

**Table A.1.** Sediment Surface Properties at Each Site

| **Site** | **Crab density** | **Chl a** | **Phaeo** | **Porosity** | **TOM** | **Silt-clay** | **Grain size** |
| --- | --- | --- | --- | --- | --- | --- | --- |
|  | **(0.25 m-2)** | **(µg g-1 dw)** | **(µg g -1dw)** | **(p)** | **(%)** | **(%)** | **(µm)** |
| **S** | 24 | 9.89 | 20.28 | 0.60 | 4.41 | 11.7 | 173 |
|  | 2 | 10.68 | 27.57 | 0.62 | 5.11 | 17.6 | 155 |
|  | 6 | 8.87 | 23.47 | 0.56 | 4.33 | 13.4 | 172 |
|  | 13 | 8.73 | 22.79 | 0.62 | 4.36 | 17.4 | 150 |
|  | 14 | 11.05 | 23.63 | 0.60 | 4.53 | 13.7 | 161 |
|  | 2 | 9.74 | 24.58 | 0.59 | 3.99 | 14.5 | 166 |
|  | 20 | 8.28 | 29.93 | 0.59 | 4.37 | 12.2 | 181 |
|  | 2 | 10.50 | 28.68 | 0.60 | 5.20 | 15.2 | 171 |
|  | 29 | 5.69 | 14.11 | 0.59 | 3.68 | 11.2 | 175 |
|  | 19 | 4.98 | 13.18 | 0.54 | 3.77 | 12.4 | 177 |
|  | 0 | 13.15 | 29.25 | 0.58 | 4.27 | 16.1 | 166 |
|  | 11 | 8.95 | 18.22 | 0.57 | 3.33 | 10.2 | 198 |
|  | 0 | 10.50 | 21.03 | 0.54 | 4.56 | 18.8 | 147 |
|  | 28 | 6.45 | 16.71 | 0.56 | 3.35 | 11.3 | 194 |
|  | 9 | 11.03 | 19.75 | 0.56 | 3.55 | 16.7 | 166 |
|  | 7 | 10.04 | 16.14 | 0.50 | 3.28 | 15.8 | 174 |
| **MS** | 3 | 12.73 | 14.65 | 0.70 | 4.72 | 47.0 | 80 |
|  | 0 | 15.03 | 25.04 | 0.75 | 6.64 | 30.7 | 107 |
|  | 14 | 10.40 | 14.66 | 0.66 | 4.51 | 35.1 | 125 |
|  | 12 | 6.38 | 7.35 | 0.52 | 2.95 | 33.0 | 156 |
|  | 8 | 7.97 | 4.39 | 0.56 | 3.17 | 26.6 | 153 |
|  | 27 | 6.48 | 6.83 | 0.58 | 3.29 | 29.2 | 136 |
|  | 0 | 13.02 | 23.00 | 0.74 | 6.16 | 42.2 | 111 |
|  | 7 | 7.33 | 7.05 | 0.54 | 2.99 | 42.9 | 115 |
|  | 16 | 4.77 | 6.10 | 0.54 | 2.56 | 47.2 | 145 |
|  | 3 | 5.42 | 10.63 | 0.57 | 3.53 | 37.2 | 102 |
|  | 11 | 6.64 | 5.48 | 0.55 | 3.24 | 23.3 | 153 |
|  | 0 | 10.53 | 9.58 | 0.59 | 3.21 | 61.0 | 114 |
|  | 17 | 5.57 | 5.98 | 0.53 | 3.09 | 29.8 | 174 |
|  | 17 | 5.55 | 7.15 | 0.50 | 2.65 | 40.7 | 134 |
|  | 6 | 4.60 | 10.75 | 0.52 | 2.58 | 41.0 | 155 |

TOM: total organic matter; Chl *a*: sediment chlorophyll *a* concentration; phaeo: sediment phaeophytin concentration
